# Supplementary material for: A non-isolated pentagon rule C82cage stabilized by a stretched Sc3N cluster
Source: Royal Society of Chemistry journal article supplement (doi:10.1039/d1cc00328c), 2021-01-01
Supplement: d1cc00328c1.pdf [file d1cc00328c1.pdf]

## Supporting Information

### A Non-Isolated Pentagon Rule $C_{82}$ Cage Stabilized by a Stretched $Sc_3N$ Cluster

Min Guo,<sup>a†</sup> Xiaomeng Li,<sup>a†</sup> Yang-Rong Yao,<sup>b</sup> Jiaxin Zhuang,<sup>a</sup> Qingyu Meng,<sup>a</sup> Yingjing Yan,<sup>a</sup> Xinye Liu<sup>a</sup> and Ning Chen<sup>a\*</sup>

<sup>a</sup> College of Chemistry, Chemical Engineering and Materials Science, and State Key Laboratory of Radiation Medicine and Protection, Soochow University, Suzhou, Jiangsu 215123, P.R. China.

Email: chenning@suda.edu.cn

<sup>b</sup> Department of chemistry, University of Texas at El Paso. 500W University Avenue, El Paso, Texas 79968, USA

†These authors contribute equally to this work.

## Table of Contents

|                                                                                                                                                                                                                                               |    |
|-----------------------------------------------------------------------------------------------------------------------------------------------------------------------------------------------------------------------------------------------|----|
| <b>Experimental Details</b> .....                                                                                                                                                                                                             | 3  |
| <b>Synthesis and isolation of <math>\text{Sc}_3\text{N}@C_5(39663)\text{-C}_{82}</math> and <math>\text{Sc}_3\text{N}@C_{2v}(39718)\text{-C}_{82}</math></b> .....                                                                            | 3  |
| <b>Fig. S1</b> HPLC separation process and corresponding mass spectra of $\text{Sc}_3\text{N}@C_5(39663)\text{C}_{82}$ .....                                                                                                                  | 5  |
| <b>Fig. S2</b> HPLC separation process and corresponding mass spectra of $\text{Sc}_3\text{N}@C_{2v}(39718)\text{C}_{82}$ .....                                                                                                               | 6  |
| <b>Electrochemical studies of <math>\text{Sc}_3\text{N}@C_5(39663)\text{-C}_{82}</math></b> .....                                                                                                                                             | 7  |
| <b>Spectroscopic studies of <math>\text{Sc}_3\text{N}@C_5(39663)\text{-C}_{82}</math> and <math>\text{Sc}_3\text{N}@C_{2v}(39718)\text{-C}_{82}</math></b> .....                                                                              | 7  |
| <b>Single-Crystal X-ray Diffraction</b> .....                                                                                                                                                                                                 | 7  |
| <b>Fig. S3</b> (a) a diagram showing the relative orientation of the two different triangular $\text{Sc}_3\text{N}$ units. (b) Perspective drawing show the disorder of Sc in the $\text{Sc}_3\text{N}$ cluster. N atom is fully ordered..... | 8  |
| <b>Table S1. Comparison of the distances between the metal and closest cage carbon for <math>\text{Sc}_3\text{N}@C_5(39663)\text{-C}_{82}</math> and <math>\text{Gd}_3\text{N}@C_5(39663)\text{-C}_{82}</math></b> .....                      | 8  |
| <b>Table S2. Occupancy of disorder Sc site in the <math>\text{Sc}_3\text{N}</math> cluster</b> .....                                                                                                                                          | 8  |
| <b>Table S3. Bond lengths and bond angles of the <math>\text{Sc}_3\text{N}</math> cluster in the major orientation</b> .....                                                                                                                  | 9  |
| <b>Fig. S4 Comparison of the endohedral structures of <math>\text{Sc}_3\text{N}@C_5(39663)\text{-C}_{82}</math> (a) and <math>\text{Sc}_3\text{N}@C_{2v}(39718)\text{-C}_{82}</math> (b)</b> .....                                            | 9  |
| <b>Fig. S5 Stone-Wales transformation of <math>C_5(39663)\text{-C}_{82}</math>, <math>C_5(6)\text{-C}_{82}</math> and <math>C_{2v}(39718)\text{-C}_{82}</math></b> .....                                                                      | 9  |
| <b>Reference</b> .....                                                                                                                                                                                                                        | 10 |

## Experimental Details

**Synthesis of  $\text{Sc}_3\text{N}@C_5(39663)\text{-C}_{82}$ .**  $\text{Sc}_3\text{N}@C_5(39663)\text{-C}_{82}$  was synthesized by a modified Krätschmer-Huffman DC arc-discharge method. Each graphite rod packed with a mixture of  $\text{Sc}_2\text{O}_3$  and graphite powder (molar ratio of  $\text{Sc}/\text{C} = 1:24$ ) was vaporized in the arcing chamber under 266 mbar He and 5 mbar  $\text{N}_2$  atmosphere. The resulting raw soot was collected and extracted with  $\text{CS}_2$  for 12 h. On the average ca. 30 mg of crude fullerene mixture per rod was obtained. Finally, 150 graphite rods was vaporized and ca. 0.8 mg  $\text{Sc}_3\text{N}@C_5(39663)\text{-C}_{82}$  was obtained. Besides  $\text{Sc}_3\text{N}@C_5(39663)\text{-C}_{82}$ , ca. 0.2 mg  $\text{Sc}_3\text{N}@C_{2v}(39718)\text{-C}_{82}$  was obtained and other scandium-based endohedral fullerenes  $\text{Sc}@C_{2n}$  and  $\text{Sc}_3\text{N}@C_{2n}$  were also formed along with empty fullerenes during arcing progress.

**High performance liquid chromatography (HPLC) separation process of  $\text{Sc}_3\text{N}@C_5(39663)\text{-C}_{82}$ .** The first stage was performed on a Buckyprep-M column (25 mm × 250 mm, Cosmosil Nacalai Tesque) with toluene as mobile phase. After that, as shown in Figure S1, fraction 9 (from 34 to 60 min, marked in orange) was re-injected into a Buckyprep column (10mm × 250 mm, Cosmosil Nacalai Tesque) for the second stage separation using toluene as the eluent. The fraction marked in green which contained  $\text{Sc}_3\text{N}@C_5(39663)\text{-C}_{82}$  was collected. The third stage of separation was conducted on a 5PBB column (10mm × 250 mm, Cosmosil Nacalai Tesque) with toluene as the eluent. The fraction marked in cyan which contained  $\text{Sc}_3\text{N}@C_5(39663)\text{-C}_{82}$  was collected. The last stage separation was conducted on a Buckyprep-M column (10mm × 250 mm, Cosmosil Nacalai Tesque) using toluene as the eluent and pure  $\text{Sc}_3\text{N}@C_5(39663)\text{-C}_{82}$  was got. The purity of the isolated  $\text{Sc}_3\text{N}@C_5(39663)\text{-C}_{82}$  was reconfirmed by chromatography on a Buckyprep-M column with toluene at the flow rate 4 mL/min, along with MALDI-TOF mass spectrometry in a positive charge mode. The wavelength of detection used for HPLC was 310 nm.

**High performance liquid chromatography (HPLC) separation process of  $\text{Sc}_3\text{N}@C_{2v}(39718)\text{-C}_{82}$ .** The first stage was performed on a Buckyprep-M column (25 mm × 250 mm, Cosmosil Nacalai Tesque) with toluene as mobile phase. After that, as shown in Figure S2, fraction 8 (from 28 to 33 min, marked in red) was re-injected into a Buckyprep column (10mm × 250 mm, Cosmosil Nacalai Tesque) for the second stage separation using toluene as the eluent. The fraction marked in yellow which contained  $\text{Sc}_3\text{N}@C_{2v}(39718)\text{-C}_{82}$  was collected. The third stage of separation was conducted on a 5PBB column (10mm × 250 mm, Cosmosil Nacalai Tesque) with toluene as the eluent. The

fraction marked in orange which contained  $\text{Sc}_3\text{N}@C_{2v}(39718)\text{-C}_{82}$  was collected. The last stage separation was recycled on a 5PBB column (10mm  $\times$  250 mm, Cosmosil Nacalai Tesque) using toluene as the eluent and pure  $\text{Sc}_3\text{N}@C_{2v}(39718)\text{-C}_{82}$  was got. The purity of the isolated  $\text{Sc}_3\text{N}@C_{2v}(39718)\text{-C}_{82}$  was reconfirmed by chromatography on a Buckyprep-M column with toluene at the flow rate 4 mL/min, along with MALDI-TOF mass spectrometry in a positive charge mode. The wavelength of detection used for HPLC was 310 nm.

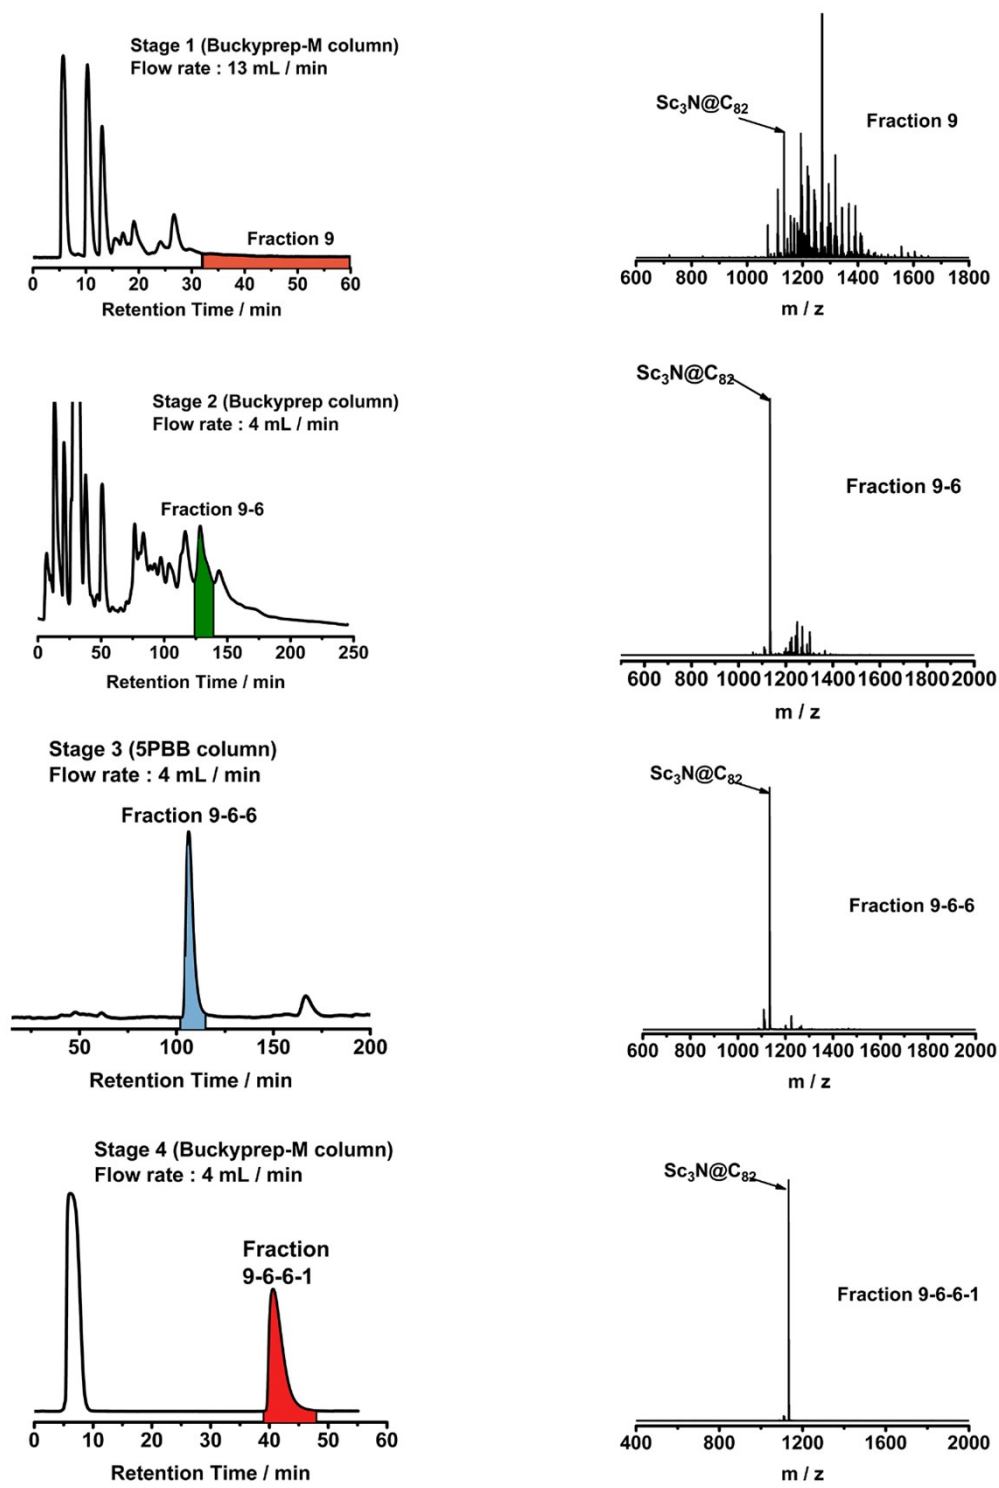

**Fig. S1** HPLC profiles showing the separation of Sc<sub>3</sub>N@C<sub>s</sub>(39663)-C<sub>82</sub> (left) and the corresponding MALDI-TOF mass spectra (right).

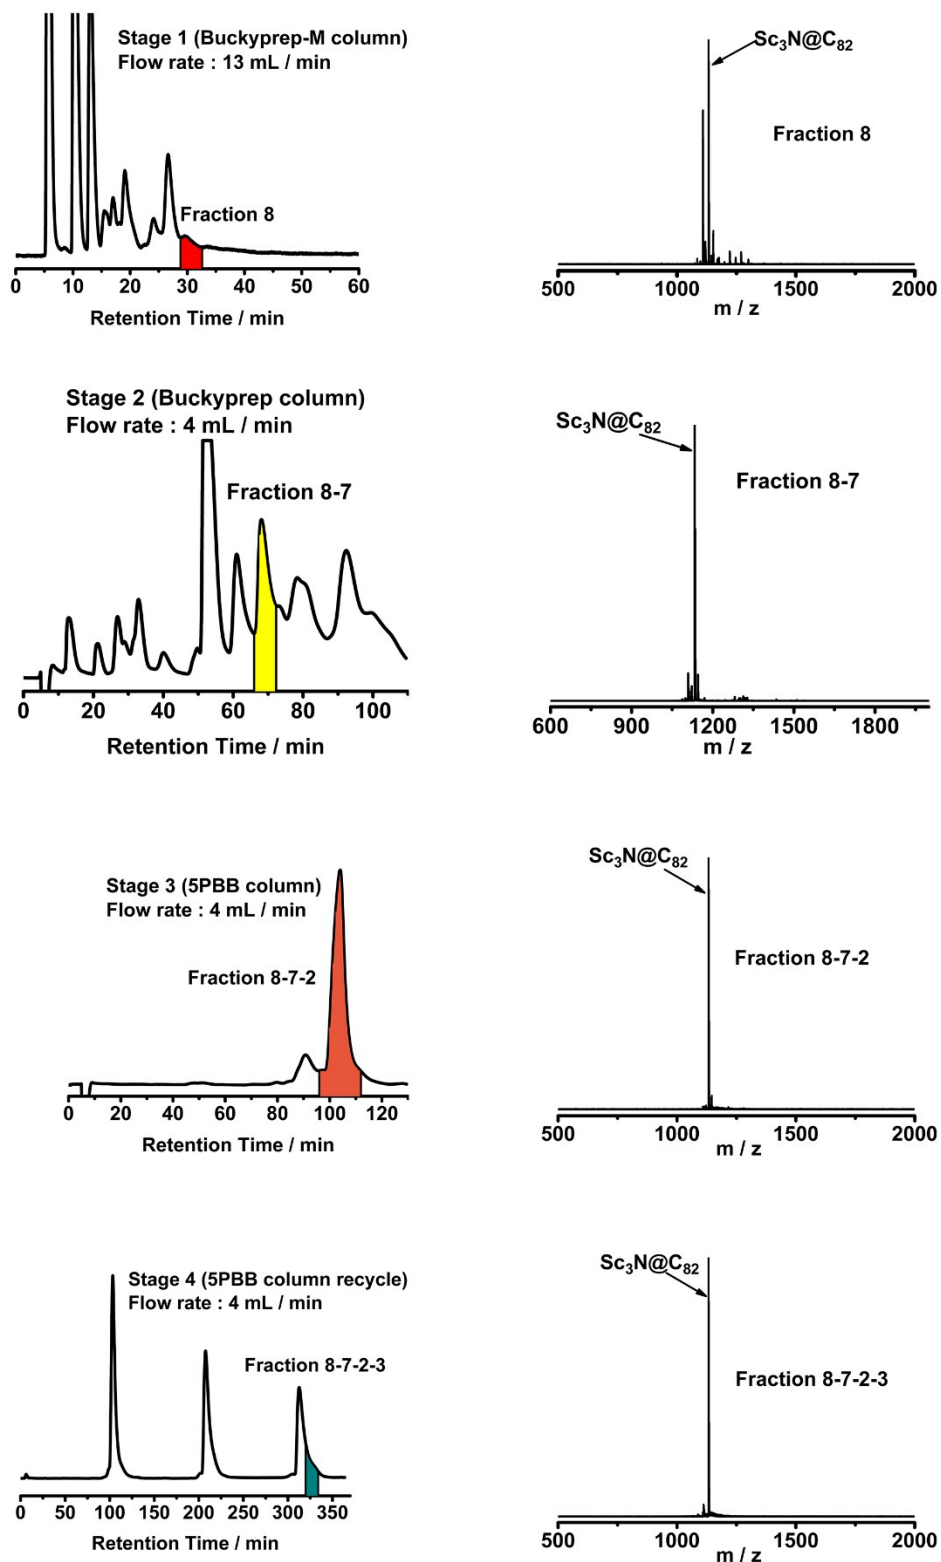

**Fig. S2** HPLC profiles showing the separation of  $Sc_3N@C_{2v}(39718)-C_{82}$  (left) and the corresponding MALDI-TOF mass spectra (right).

**Electrochemical studies of Sc<sub>3</sub>N@C<sub>5</sub>(39663)-C<sub>82</sub>.** Cyclic voltammetry (CV) was obtained in *o*-dichlorobenzene using a CHI-660E instrument. A conventional three-electrode cell consisting of a platinum counter-electrode, a glassy carbon working electrode, and a silver reference electrode was used for the measurement. (n-Bu)<sub>4</sub>NPF<sub>6</sub> (0.05 M) was used as the supporting electrolyte. The CV was measured at a scan rate of 100 mV/s.

**Spectroscopic studies of Sc<sub>3</sub>N@C<sub>5</sub>(39663)-C<sub>82</sub> and Sc<sub>3</sub>N@C<sub>2v</sub>(39718)-C<sub>82</sub>.** The positive-ion mode matrix assisted laser desorption/ionization time-of-flight (Bruker, German) was employed for the mass characterization. UV-vis-NIR spectrum of the purified Sc<sub>3</sub>N@C<sub>5</sub>(39663)-C<sub>82</sub> and Sc<sub>3</sub>N@C<sub>2v</sub>(39718)-C<sub>82</sub> was measured in CS<sub>2</sub> solution with a Cary 5000 UV-vis-NIR spectrophotometer (Agilent, USA).

**Single-Crystal X-ray Diffraction.** Black cocrystals of Sc<sub>3</sub>N@C<sub>5</sub>(39663)-C<sub>82</sub>·[Ni<sup>II</sup>(OEP)]·C<sub>6</sub>H<sub>6</sub> were obtained by allowing a solution of the fullerene in CS<sub>2</sub> and a solution of [Ni<sup>II</sup>(OEP)] in benzene to diffuse together. X-ray data were collected at 130 K using a diffractometer (APEX II; Bruker Analytik GmbH) equipped with a CCD collector. The multi-scan method was used for absorption correction. The structure was resolved using direct methods<sup>1</sup> (SIR2004) and refined on *F*<sup>2</sup> using full-matrix least-squares using SHELXL2015.<sup>2</sup> Hydrogen atoms were inserted at calculated positions and constrained with isotropic thermal parameters.

Crystal data for Sc<sub>3</sub>N@C<sub>5</sub>(39663)-C<sub>82</sub>·[Ni<sup>II</sup>(OEP)]·C<sub>6</sub>H<sub>6</sub>: C<sub>124</sub> H<sub>50</sub> N<sub>5</sub> Ni Sc<sub>3</sub>, *M<sub>r</sub>* = 1803.28, 0.2 × 0.15 × 0.08 mm<sup>3</sup>, monoclinic, space group *P*2<sub>1</sub>/*c* (No. 14), *a* = 19.830(5) Å, *b* = 15.111(3) Å, *c* = 25.233(8) Å, *α* = 90°, *β* = 93.958(19)°, *γ* = 90°, *V* = 7543(3) Å<sup>3</sup>, *Z* = 4, *ρ*<sub>calcd</sub> = 1.588 g cm<sup>-3</sup>, *μ*(Cu Kα) = 3.039 mm<sup>-1</sup>, *θ* = 2.233–68.331°, *T* = 130(2) K, *R*<sub>1</sub> = 0.0921, *wR*<sub>2</sub> = 0.2368 for all data; *R*<sub>1</sub> = 0.0794, *wR*<sub>2</sub> = 0.2210 for 11277 reflections (*I* > 2.0σ(*I*)) with 1233 parameters. Goodness of fit indicator 1.057. Maximum residual electron density 1.353 e Å<sup>-3</sup>.

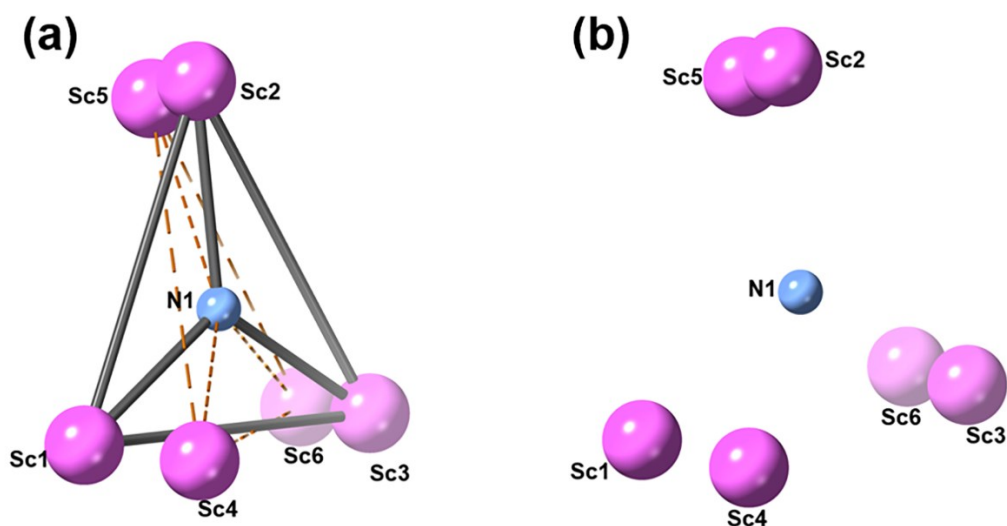

**Fig. S3** (a) a diagram showing the relative orientation of the two different triangular  $\text{Sc}_3\text{N}$  units. (b) Perspective drawing shows the disorder of Sc in the  $\text{Sc}_3\text{N}$  cluster. N atom is fully ordered.

**Table S1. Comparison of the distances between the metal and closest cage carbon for  $\text{Sc}_3\text{N}@C_5(39663)\text{-C}_{82}$  and  $\text{Gd}_3\text{N}@C_5(39663)\text{-C}_{82}^3$  (distances are given in angstrom)**

| compound                                       | M-C     | Distance / Å |
|------------------------------------------------|---------|--------------|
| $\text{Sc}_3\text{N}@C_5(39663)\text{-C}_{82}$ | Sc1-C1  | 2.329(6)     |
|                                                | Sc1-C5  | 2.316(6)     |
|                                                | Sc2-C49 | 2.272(6)     |
|                                                | Sc2-C50 | 2.280(6)     |
|                                                | Sc3-C59 | 2.340(5)     |
|                                                | Sc3-C60 | 2.256(5)     |
| $\text{Gd}_3\text{N}@C_5(39663)\text{-C}_{82}$ | Gd1-C78 | 2.476(10)    |
|                                                | Gd1-C82 | 2.48(10)     |
|                                                | Gd2-C28 | 2.370(8)     |
|                                                | Gd3-C17 | 2.438(9)     |
|                                                | Gd3-C18 | 2.429(8)     |

**Table S2. Occupancy of disordered Sc site in the  $\text{Sc}_3\text{N}$  cluster.**

| Atom      | Sc1   | Sc2   | Sc3   | Sc4   | Sc5   | Sc6   |
|-----------|-------|-------|-------|-------|-------|-------|
| Occupancy | 0.817 | 0.817 | 0.817 | 0.183 | 0.183 | 0.183 |

**Table S3. Bond lengths and bond angles of the  $\text{Sc}_3\text{N}$  cluster in the major orientation.**



|            |            |            |            |
|------------|------------|------------|------------|
|            | Sc1-N1     | Sc2-N1     | Sc3-N1     |
| Length (Å) | 2.112(3)   | 2.052(4)   | 2.038(3)   |
|            | Sc1-N-Sc2  | Sc1-N-Sc3  | Sc2-N-Sc3  |
| Angle (°)  | 118.05(17) | 117.45(14) | 124.43(18) |

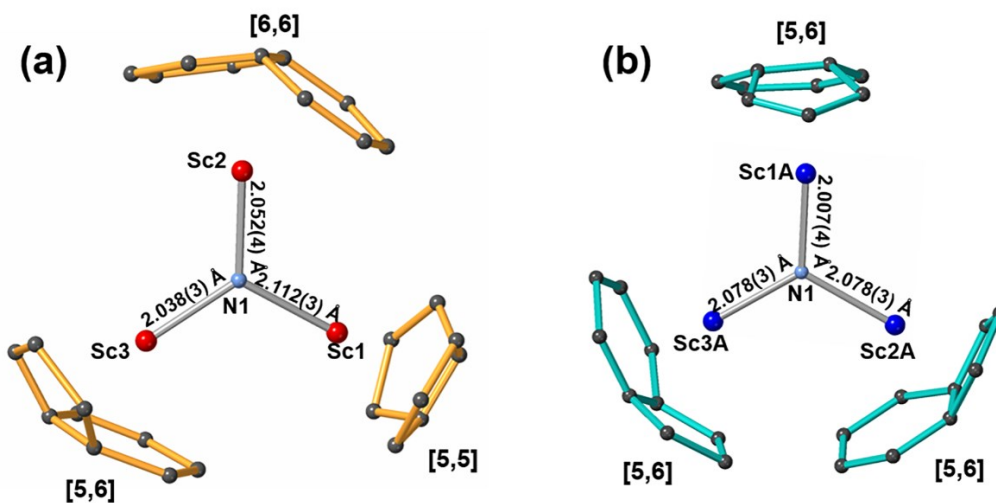

Fig. S4 Comparison of the endohedral structures of  $Sc_3N@C_5(39663)-C_{82}$  (a) and  $Sc_3N@C_{2v}(39718)-C_{82}$  (b).

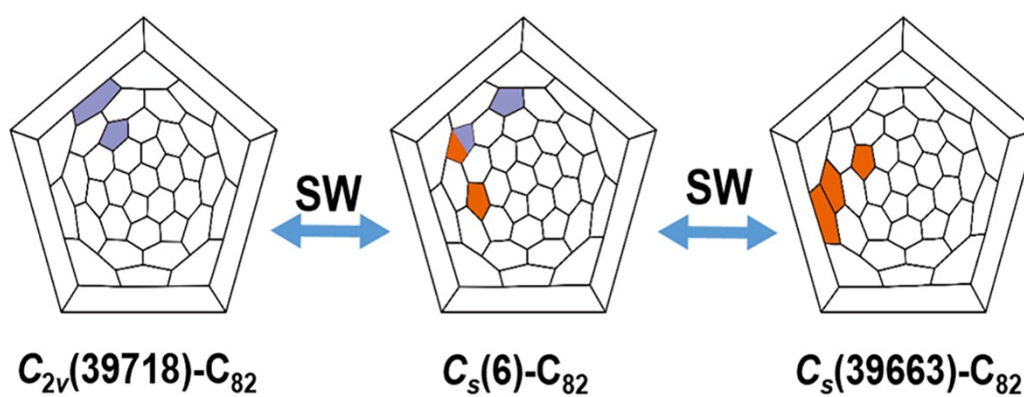

Fig. S5 Stone-Wales transformation of  $C_5(39663)-C_{82}$ ,  $C_5(6)-C_{82}$  and  $C_{2v}(39718)-C_{82}$ .

Reference

- 1 Dolomanov, O. V.; Bourhis, L. J.; Gildea, R. J.; Howard, J. A. K.; Puschmann, H., *J. Appl. Crystallogr.*, 2009, **42**, 339-341.
- 2 Sheldrick, G., *Acta Crystallogr., Sect. C: Struct. Chem.*, 2015, **71**, 3-8.
- 3 Mercado, B. Q.; Beavers, C. M.; Olmstead, M. M.; Chaur, M. N.; Walker, K.; Holloway, B. C.; Echegoyen, L.; Balch, A. L., *J. Am. Chem. Soc.*, 2008, **130**, 7854-7855.
